# Supplementary material for: Adsorption of Nd(iii) on a multistage porous imprinted chitosan composite membrane
Source: Royal Society of Chemistry journal article supplement (doi:10.1039/d2nj02776c), 2022-01-01
Supplement: d2nj02776c1.pdf [file d2nj02776c1.pdf]

# Supporting Information

## Adsorption of Nd(III) on multistage porous imprinted chitosan composite membrane

Yuzhe Zhang<sup>a</sup>, Jie Hua<sup>a</sup>, Hao Wu<sup>a</sup>, Yizi Shao<sup>c</sup>, Peiyang Gu<sup>b\*</sup>, Zhongyu Li<sup>a,b\*</sup>

<sup>a</sup> *School of Environmental and Safety Engineering, Changzhou University, Changzhou 213164, PR China*

<sup>b</sup> *Jiangsu Key Laboratory of Advanced Catalytic Materials and Technology, School of Petrochemical Engineering, Changzhou University, Changzhou 213164, PR China*

<sup>c</sup> *Changzhou University School of Environmental & Safety Engineering, School of Urban Construction, School of Emergency Management Science and Engineering*

---

\* Corresponding author. Tel.: +86-519-86330088; Fax: +86-519-86330088

E-mail address: gupeiyang0714@cczu.edu.cn ;zhongyuli@mail.tsinghua.edu.cn

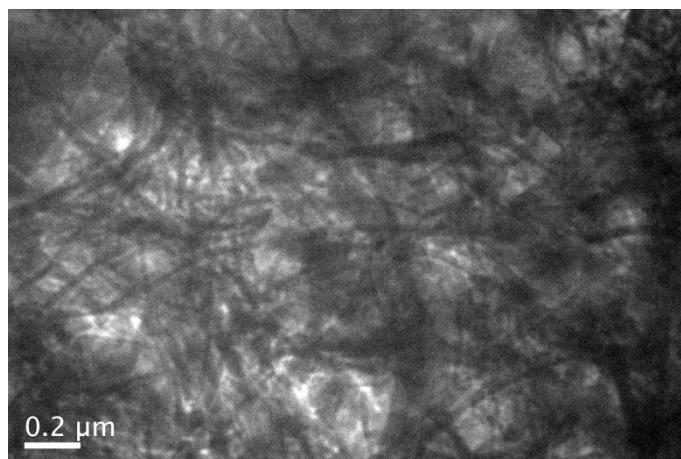

**Fig. S1** TEM image of IPEI-CS@CNFAs.

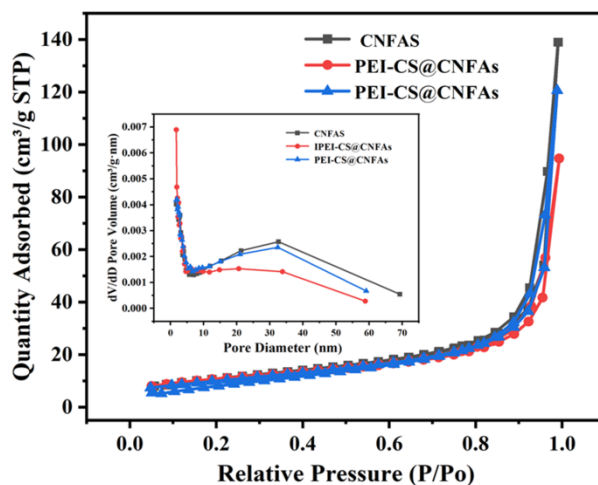

**Fig. S2** The N<sub>2</sub> adsorption–desorption isotherms and corresponding pore size distribution curves of CNFAs, PEI-CS@CNFAs and IPEI-CS@CNFAs.

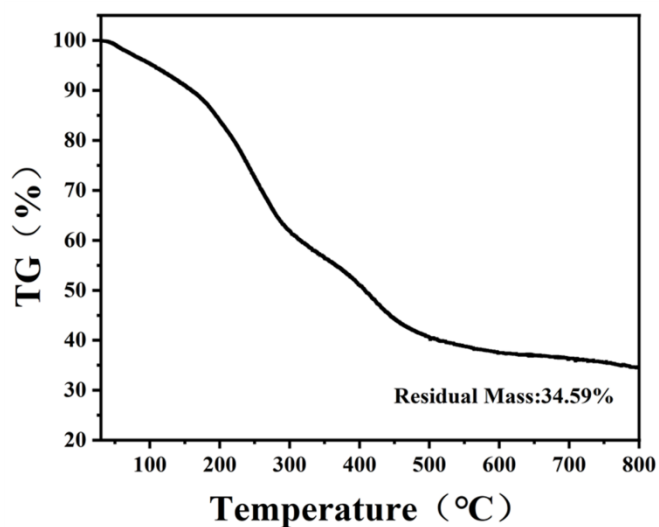

**Fig. S3** Thermogravimetric analysis curves of IPEI-CS@CNFAs.
